# Supplementary material for: Evaluation of Cell Binding Activities of Leptospira ECM Adhesins
Source: PubMed Central journal article supplement (PMC4397020; doi:10.1371/journal.pntd.0003712), 2015-04-14
Supplement: pntd.0003712.s003.pdf [file pntd.0003712.s003.pdf]

**Table S2**

| <b>ADHESIN COMPARISON</b> | <b>heparan sulfate</b> | <b>chondroitin sulfate B</b> | <b>fibronectin</b> |
|---------------------------|------------------------|------------------------------|--------------------|
| β-gal vs Loa22            | ns                     | ns                           | ns                 |
| β-gal vs LipL32           | ns                     | ns                           | *                  |
| β-gal vs p31/45           | ns                     | ns                           | ns                 |
| β-gal vs LenA             | ns                     | ns                           | ns                 |
| β-gal vs LipL48           | ns                     | ns                           | ns                 |
| β-gal vs OmpL1-P2         | ***                    | ***                          | *                  |
| Loa22 vs LipL32           | ns                     | ns                           | ***                |
| Loa22 vs p31/45           | ns                     | ns                           | ns                 |
| Loa22 vs LenA             | ns                     | ns                           | ns                 |
| Loa22 vs LipL48           | ns                     | ns                           | ns                 |
| Loa22 vs OmpL1-P2         | ***                    | ***                          | ***                |
| LipL32 vs p31/45          | ns                     | ns                           | **                 |
| LipL32 vs LenA            | ns                     | ns                           | **                 |
| LipL32 vs LipL48          | ns                     | ns                           | **                 |
| LipL32 vs OmpL1-P2        | ***                    | ***                          | ns                 |
| p31/45 vs LenA            | ns                     | ns                           | ns                 |
| p31/45 vs LipL48          | ns                     | ns                           | ns                 |
| p31/45 vs OmpL1-P2        | ***                    | ***                          | **                 |
| LenA vs LipL48            | ns                     | ns                           | ns                 |
| LenA vs OmpL1-P2          | ***                    | ***                          | **                 |
| LipL48 vs OmpL1-P2        | ***                    | ***                          | **                 |
